# Supplementary material for: Predicting the Potential Current and Future Distribution of the Endangered Endemic Vascular Plant Primula boveana Decne. ex Duby in Egypt
Source: MDPI journal article supplement (doi:10.3390/plants9080957), 2020-07-29
Supplement: s1 [file s1]

## Supplementary Materials (Appendices)

**Table S1.** A Pearson correlation matrix among measured population parameters of *P. boveana*. Bold values are significantly different at  $p < 0.05$ .

| Variables   | Density | Cover | Size Index   | Plant Vigor |
|-------------|---------|-------|--------------|-------------|
| Density     | 1       | 0.516 | <b>0.798</b> | 0.044       |
| Cover       |         | 1     | 0.208        | 0.462       |
| Size index  |         |       | 1            | 0.428       |
| Plant vigor |         |       |              | 1           |

**Table S2.** Environmental datasets used in the analysis.

| Type        | Code/Unit                      | Environmental Variables                                                                      | Source and Resolution               |
|-------------|--------------------------------|----------------------------------------------------------------------------------------------|-------------------------------------|
| Bioclimatic | Bio1 (°C)                      | Annual mean temperature                                                                      | WorldClim v.2 (~1 km <sup>2</sup> ) |
|             | Bio2 (°C)                      | Mean diurnal range (max. temp–min. temp)                                                     |                                     |
|             | Bio3 (°C)                      | Isothermality (Bio2/Bio7) × 100                                                              |                                     |
|             | Bio4 (unitless)                | Temperature seasonality (SD × 100)                                                           |                                     |
|             | Bio5 (°C)                      | Max temperature of warmest month                                                             |                                     |
|             | Bio6 (°C)                      | Min temperature of coldest month                                                             |                                     |
|             | Bio7 (°C)                      | Temperature annual range (Bio5-Bio6)                                                         |                                     |
|             | Bio8 (°C)                      | Mean temperature of wettest quarter                                                          |                                     |
|             | Bio9 (°C)                      | Mean temperature of driest quarter                                                           |                                     |
|             | Bio10 (°C)                     | Mean temperature of warmest quarter                                                          |                                     |
|             | Bio11 (°C)                     | Mean temperature of coldest quarter                                                          |                                     |
|             | Bio12 (mm)                     | Annual precipitation                                                                         |                                     |
|             | Bio13 (mm)                     | Precipitation of wettest month                                                               |                                     |
|             | Bio14 (mm)                     | Precipitation of driest month                                                                |                                     |
|             | Bio15 (unitless)               | Precipitation seasonality (Coefficient of variation)                                         |                                     |
|             | Bio16 (mm)                     | Precipitation of wettest quarter                                                             |                                     |
|             | Bio17 (mm)                     | Precipitation of driest quarter                                                              |                                     |
|             | Bio18 (mm)                     | Precipitation of warmest quarter                                                             |                                     |
|             | Bio19 (mm)                     | Precipitation of coldest quarter                                                             |                                     |
|             | Thermicity index (°C)          | Sum of mean annual temp., min. temp. of coldest month, max. temp. of the coldest month, × 10 | ENVIREM (~1 km <sup>2</sup> ).      |
|             | PET seasonality (mm/month)     | Potential evapotranspiration (PET)                                                           |                                     |
|             | Annual PET (mm/year)           | A measure of the ability of the atmosphere to remove water through evapotranspiration        |                                     |
|             | PET wettest quarter (mm/month) | Mean monthly PET of wettest quarter                                                          |                                     |
|             | PET warmest quarter (mm/month) | Mean monthly PET of warmest quarter                                                          |                                     |
|             | Continentality (°C)            | Average temp. of warmest month-average temp. of coldest month                                |                                     |
|             | ClimMoisIndex (unitless)       | A metric of relative wetness and aridity                                                     |                                     |
|             | Aridity index (unitless)       | The degree of water deficit below water need                                                 |                                     |
| Topographic | Elev (m. a.s.l)                | Elevation                                                                                    | DIVA-GIS (1 × 1 km)                 |
|             | Slope (%)                      | Slope                                                                                        | Derived from Elev.                  |
|             | Aspect (degree)                | Aspect                                                                                       | Derived from Elev.                  |
| Edaphic *   | BD (g/cm <sup>3</sup> )        | Bulk density                                                                                 | SoilGrids (1 km <sup>2</sup> )      |
|             | CF (%)                         | Coarse fragments volumetric                                                                  |                                     |
|             | Clay (%)                       | Clay content                                                                                 |                                     |
|             | Silt (%)                       | Silt content                                                                                 |                                     |
|             | Sand (%)                       | Sand content                                                                                 |                                     |
|             | CEC (cmolc/kg)                 | Cation exchange capacity                                                                     |                                     |
|             | OC (g/kg)                      | Organic carbon content                                                                       |                                     |
|             | pH                             | pH in H <sub>2</sub> O                                                                       |                                     |

\*Edaphic data are mean of four soil depths interval (0.00, 0.05, 0.15 and 0.30 m).
